# Supplementary material for: Creation of a 3D Goethite–Spongin Composite Using an Extreme Biomimetics Approach
Source: MDPI journal article supplement (doi:10.3390/biomimetics8070533), 2023-11-09
Supplement: s1 [file s1]

# Creation of a 3D Goethite–Spongin Composite Using an Extreme Biomimetics Approach

Anita Kubiak <sup>1,2,\*</sup>, Alona Voronkina <sup>3,4</sup>, Martyna Pajewska-Szmyt <sup>2</sup>, Martyna Kotula <sup>1,2</sup>, Bartosz Leśniewski <sup>1,2</sup>, Alexander Ereskovsky <sup>5</sup>, Korbinian Heimler <sup>6</sup>, Anika Rogoll <sup>6</sup>, Carla Vogt <sup>6</sup>, Parvaneh Rahimi <sup>3</sup>, Sedigheh Falahi <sup>3</sup>, Roberta Galli <sup>7</sup>, Enrico Langer <sup>8</sup>, Maik Förste <sup>9</sup>, Alexandros Charitos <sup>9</sup>, Yvonne Joseph <sup>3</sup>, Hermann Ehrlich <sup>2,10</sup> and Teofil Jesionowski <sup>10,\*</sup>

<sup>1</sup> Faculty of Chemistry, Adam Mickiewicz University, Uniwersytetu Poznańskiego 8, 61-614 Poznań, Poland; markot6@amu.edu.pl (M.K.); barles5@amu.edu.pl (B.L.)

<sup>2</sup> Center of Advanced Technology, Adam Mickiewicz University, Uniwersytetu Poznańskiego 10, 61-614 Poznań, Poland; mpszmyt@amu.edu.pl (M.P.-S.); herehr@amu.edu.pl (H.E.)

<sup>3</sup> Institute of Electronics and Sensor Materials, TU Bergakademie Freiberg, Gustav-Zeuner-Str. 3, 09599 Freiberg, Germany; voronkina@vnmue.edu.ua (A.V.); parvaneh.rahimi@esm.tu-freiberg.de (P.R.); sedigheh.falahi@doktorand.tu-freiberg.de (S.F.); yvonne.joseph@esm.tu-freiberg.de (Y.J.)

<sup>4</sup> Department of Pharmacy, National Pirogov Memorial Medical University, Vinnytsya, Pyrogov Street. 56, 21018 Vinnytsia, Ukraine

<sup>5</sup> IMBE, CNRS, IRD, Aix Marseille University, Station Marine d'Endoume, Rue de la Batterie des Lions, 13007 Marseille, France; alexander.ereskovsky@imbe.fr

<sup>6</sup> Institute of Analytical Chemistry, TU Bergakademie Freiberg, Leipziger Str. 29, 09599 Freiberg, Germany; korbinian.heimler@chemie.tu-freiberg.de (K.H.); anika.rogoll@chemie.tu-freiberg.de (A.R.); carla.vogt@chemie.tu-freiberg.de (C.V.)

<sup>7</sup> Department of Medical Physics and Biomedical Engineering, Faculty of Medicine Carl Gustav Carus, TU Dresden, Fetscherstr. 74, 01307 Dresden, Germany; roberta.galli@tu-dresden.de

<sup>8</sup> Institute of Semiconductors and Microsystems, TU Dresden, Nöthnitzer Str. 64, 01187 Dresden, Germany

<sup>9</sup> Institute for Nonferrous Metallurgy and Purest Materials (INEMET), TU Bergakademie Freiberg, Leipziger Str. 34, 09599 Freiberg, Germany; maik.foerste@inemet.tu-freiberg.de (M.F.); alexandros.charitos@inemet.tu-freiberg.de (A.C.)

<sup>10</sup> Faculty of Chemical Technology, Institute of Chemical Technology and Engineering, Poznań University of Technology, Berdychowo 4, 60-965 Poznań, Poland

\* Correspondence: anikub@amu.edu.pl (A.K.); teofil.jesionowski@put.poznan.pl (T.J.)

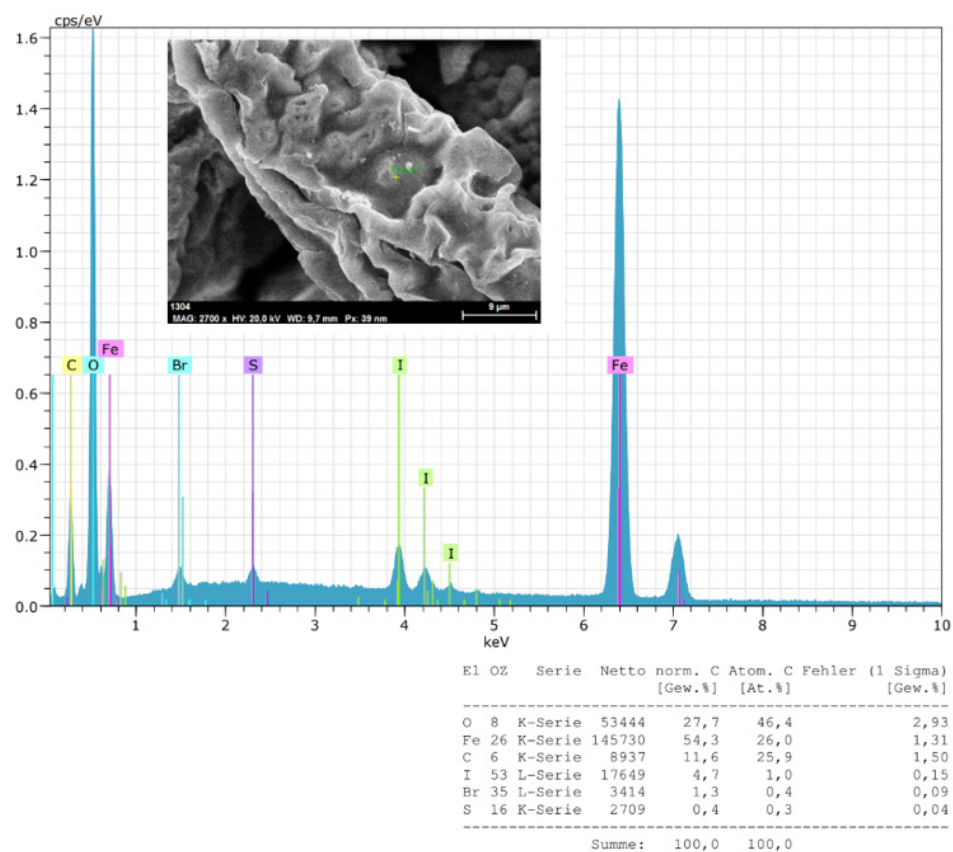

Figure S1. EDX measurements (1) of FeISpongIn composite after ultrasound treatment.

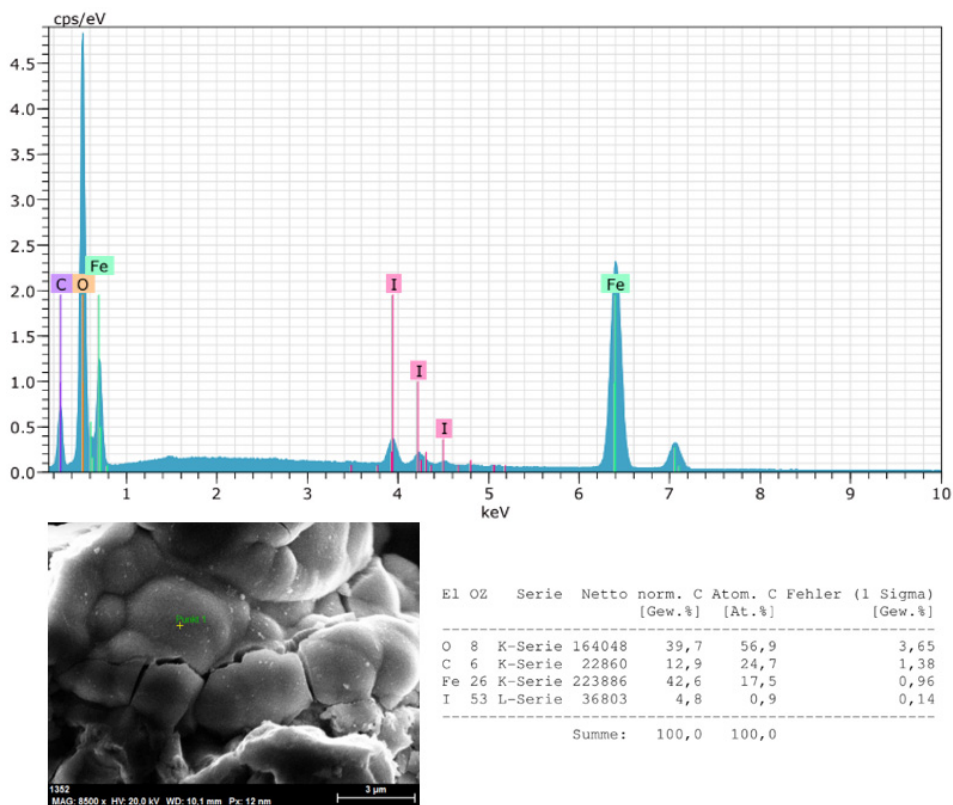

Figure S2. EDX measurements (2) of FeISpongIn composite after ultrasound treatment
